# Supplementary material for: The Influence of Cadmium on Fountain Grass Performance Correlates Closely with Metabolite Profiles
Source: MDPI journal article supplement (doi:10.3390/plants12213713), 2023-10-29
Supplement: s1 [file s1]

## Supplementary Material

# The Influence of Cadmium on Fountain Grass Performance Correlates Closely with Metabolite Profiles

Zhaorong Mi<sup>1,2</sup>, Pinlin Liu<sup>1,2</sup>, Lin Du<sup>1,2</sup>, Tao Han<sup>1,2</sup>, Chao Wang<sup>3</sup>, Xifeng Fan<sup>3</sup>, Huichao Liu<sup>1,2</sup>, Songlin He<sup>1,2\*</sup> and Juying Wu<sup>3,\*</sup>

<sup>1</sup> School of Horticulture and Landscape Architecture, Henan Institute of Science and Technology, Xinxiang 453003, China

<sup>2</sup> Henan Provincial Engineering Research Center of Horticultural Plant Resource Utilization and Germplasm Enhancement, Xinxiang 453003, China

<sup>3</sup> Institute of Grassland, Flowers and Ecology, Beijing Academy of Agriculture and Forestry Sciences, Beijing 100097, China

\* Correspondence: hsl213@163.com (S.H.); wujuying@grass-env.com (J.W.); Tel.: +86-373-3040989 (S.H.); +86-10-51503285 (J.W.)

### This file includes:

Figure S1: The morphological changes in leaf and root of fountain grass under Cd stress;

Table S1: The differential metabolites in roots of fountain grass and their relationships with leaf length, leaf fresh weight and leaf MDA content;

Table S2: The differential metabolites in roots of fountain grass and their relationships with root length, root fresh weight and root MDA content.

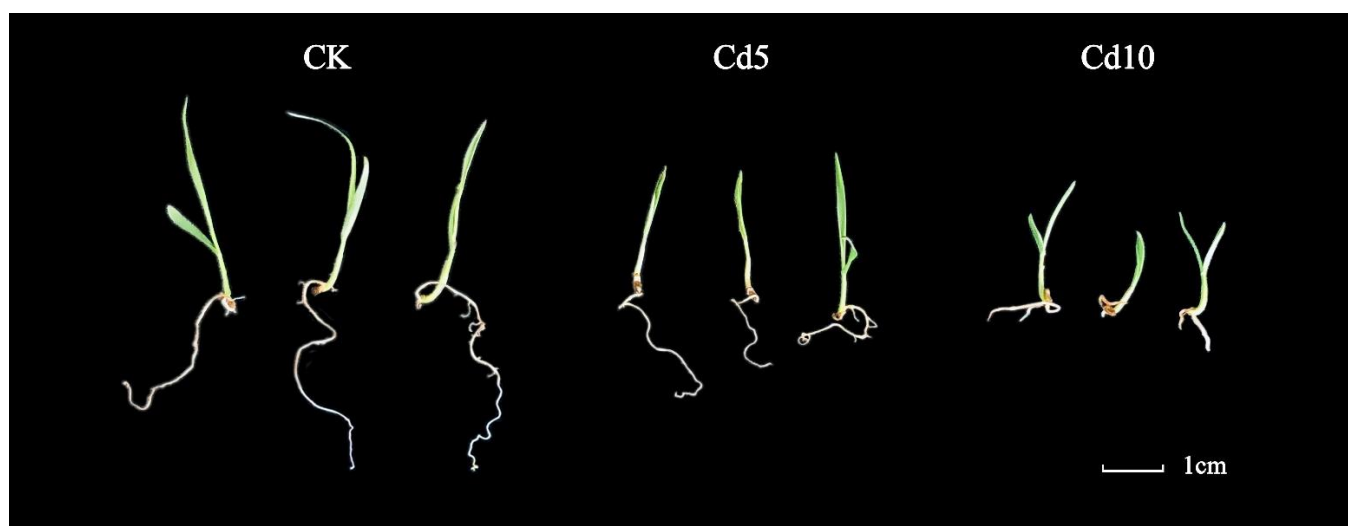

**Figure S1.** The morphological changes in leaf and root of fountain grass under Cd stress.

**Table S1:** The differential metabolites in leaves of fountain grass and their relationships with leaf length, leaf fresh weight and leaf MDA content.

| Metabolite                              | Class         | Fold Change | P    | Leaf length |      | Leaf fresh weight |      | Leaf MDA    |      |
|-----------------------------------------|---------------|-------------|------|-------------|------|-------------------|------|-------------|------|
|                                         |               |             |      | Coefficient | VIP  | Coefficient       | VIP  | Coefficient | VIP  |
| 4-Guanidinobutyric acid                 | Amino acids   | 4.81        | 0.02 | 0.00        | 0.95 | 0.04              | 0.89 | 0.00        | 0.96 |
| Gly-Leu                                 | Amino acids   | 2.39        | 0.04 | -0.01       | 0.94 | -0.04             | 1.08 | -0.01       | 0.90 |
| D-ornithine                             | Amino acids   | 2.17        | 0.00 | -0.03       | 1.09 | -0.03             | 1.09 | 0.02        | 1.07 |
| L-Asparagine                            | Amino acids   | 0.50        | 0.00 | 0.04        | 1.09 | 0.04              | 1.06 | -0.02       | 1.06 |
| Pantethine                              | Amino acids   | 0.49        | 0.02 | 0.05        | 0.96 | 0.01              | 0.80 | -0.04       | 0.96 |
| S-adenosyl-l-homocysteine               | Amino acids   | 0.46        | 0.04 | -0.02       | 0.90 | 0.03              | 0.97 | -0.02       | 0.96 |
| 3-methyl-l-histidine                    | Amino acids   | 0.44        | 0.01 | 0.01        | 0.98 | -0.01             | 0.83 | -0.03       | 1.03 |
| Cysteine-s-sulfate                      | Amino acids   | 0.40        | 0.00 | 0.02        | 1.07 | 0.02              | 1.09 | -0.02       | 1.07 |
| L-Histidine                             | Amino acids   | 0.38        | 0.01 | 0.01        | 1.03 | 0.05              | 1.15 | -0.02       | 1.03 |
| N-acetylhistidine                       | Amino acids   | 0.37        | 0.03 | -0.02       | 0.91 | -0.02             | 0.89 | -0.02       | 0.97 |
| Acetyl-dl-leucine                       | Amino acids   | 0.36        | 0.01 | 0.02        | 1.03 | 0.08              | 1.22 | -0.02       | 1.01 |
| L-Saccharopine                          | Amino acids   | 0.22        | 0.00 | 0.01        | 1.06 | 0.03              | 1.09 | -0.03       | 1.08 |
| Hydroquinone                            | Benzenoids    | 3.97        | 0.00 | -0.04       | 1.08 | -0.01             | 1.02 | 0.02        | 1.06 |
| Pentamidine                             | Benzenoids    | 2.57        | 0.00 | -0.04       | 1.10 | -0.05             | 1.13 | 0.03        | 1.08 |
| Aloin                                   | Benzenoids    | 0.13        | 0.01 | -0.01       | 0.98 | -0.02             | 0.87 | -0.03       | 1.05 |
| D-Threitol                              | Carbohydrates | 3.59        | 0.05 | -0.02       | 0.89 | 0.06              | 0.76 | -0.01       | 0.84 |
| D-galacturonic acid                     | Carbohydrates | 2.58        | 0.01 | -0.04       | 0.98 | 0.06              | 0.73 | 0.04        | 0.99 |
| Maltotriose                             | Carbohydrates | 2.22        | 0.00 | -0.03       | 1.08 | 0.01              | 0.99 | 0.02        | 1.07 |
| Gentianose                              | Carbohydrates | 0.45        | 0.03 | 0.03        | 0.96 | 0.11              | 1.08 | -0.03       | 0.94 |
| 1-Deoxy-D-xylulose 5-phosphate          | Carbohydrates | 0.44        | 0.01 | 0.07        | 1.04 | 0.08              | 1.15 | -0.03       | 0.96 |
| Udp-d-glucose                           | Carbohydrates | 0.43        | 0.02 | 0.01        | 0.96 | -0.07             | 0.80 | 0.00        | 0.95 |
| Perseitol                               | Carbohydrates | 0.40        | 0.00 | 0.05        | 1.10 | 0.04              | 1.14 | -0.02       | 1.06 |
| N-acetyl-d-glucosamine 6-phosphate      | Carbohydrates | 0.27        | 0.00 | 0.00        | 1.02 | 0.01              | 0.99 | -0.02       | 1.06 |
| 1-palmitoyl-sn-glycero-3-phosphocholine | Lipids        | 3.55        | 0.00 | -0.05       | 1.06 | 0.00              | 0.97 | 0.03        | 1.04 |
| Progesterone                            | Lipids        | 2.40        | 0.01 | -0.05       | 1.01 | -0.06             | 0.99 | 0.05        | 1.02 |
| Cucurbitacin d                          | Lipids        | 2.23        | 0.02 | 0.01        | 0.93 | 0.04              | 0.85 | 0.02        | 0.98 |
| 11-beta-hydroxyandrosterone             | Lipids        | 0.45        | 0.04 | 0.03        | 0.95 | 0.12              | 1.25 | -0.02       | 0.90 |
| Trans-traumatic acid                    | Lipids        | 0.43        | 0.03 | 0.03        | 0.97 | 0.07              | 1.16 | -0.02       | 0.92 |
| Oxandrolone                             | Lipids        | 0.43        | 0.05 | 0.04        | 0.95 | 0.12              | 1.26 | -0.01       | 0.88 |
| 2-Isopropylmalic acid                   | Lipids        | 0.40        | 0.02 | 0.02        | 0.95 | -0.03             | 0.89 | -0.02       | 0.96 |
| Endo-borneol                            | Lipids        | 0.31        | 0.04 | -0.01       | 0.87 | -0.08             | 0.59 | -0.03       | 0.96 |
| Mesaconic acid                          | Lipids        | 0.29        | 0.00 | 0.03        | 1.09 | -0.01             | 1.00 | -0.03       | 1.09 |
| Guanosine 5'-monophosphate              | Nucleosides   | 3.28        | 0.01 | -0.04       | 1.02 | -0.02             | 0.89 | 0.04        | 1.04 |
| Adenosine monophosphate                 | Nucleosides   | 2.26        | 0.00 | -0.02       | 1.05 | -0.04             | 1.10 | 0.03        | 1.07 |
| Guanosine diphosphate                   | Nucleosides   | 2.09        | 0.05 | 0.00        | 0.89 | 0.01              | 0.93 | -0.01       | 0.86 |
| Uridine 5'-monophosphate                | Nucleosides   | 2.02        | 0.01 | -0.05       | 1.08 | -0.12             | 1.27 | 0.03        | 1.02 |
| Guanosine                               | Nucleosides   | 0.36        | 0.03 | -0.01       | 0.89 | -0.07             | 0.64 | -0.03       | 0.98 |
| Oxalate                                 | Organic acids | 3.17        | 0.00 | -0.05       | 1.04 | 0.00              | 0.88 | 0.04        | 1.03 |
| Citrate                                 | Organic acids | 0.44        | 0.01 | 0.05        | 1.04 | 0.04              | 1.03 | -0.01       | 0.98 |
| L-Malic acid                            | Organic acids | 0.43        | 0.00 | 0.03        | 1.07 | 0.07              | 1.18 | -0.02       | 1.04 |
| Glutaric acid                           | Organic acids | 0.37        | 0.04 | 0.00        | 0.87 | -0.08             | 0.57 | -0.02       | 0.92 |
| 3-dehydroquinic acid                    | Others        | 4.19        | 0.00 | -0.03       | 1.06 | -0.06             | 1.14 | 0.02        | 1.04 |
| Chlorambucil                            | Others        | 4.07        | 0.00 | -0.03       | 1.09 | -0.02             | 1.10 | 0.02        | 1.07 |
| Astemizole                              | Others        | 2.08        | 0.03 | -0.04       | 0.97 | -0.15             | 1.29 | 0.03        | 0.94 |

|                                  |                                  |      |      |       |      |       |      |       |      |
|----------------------------------|----------------------------------|------|------|-------|------|-------|------|-------|------|
| Genistein                        | Phenylpropanoids and polyketides | 4.83 | 0.02 | -0.01 | 0.93 | 0.07  | 0.73 | 0.03  | 0.99 |
| P-coumaric acid                  | Phenylpropanoids and polyketides | 3.00 | 0.00 | -0.04 | 1.08 | 0.00  | 0.96 | 0.03  | 1.08 |
| 3-hydroxy-4-methoxycinnamic acid | Phenylpropanoids and polyketides | 2.01 | 0.02 | 0.00  | 0.97 | -0.04 | 1.06 | 0.00  | 0.97 |
| Indole-3-acetamide               | Phytohormones                    | 0.38 | 0.05 | -0.03 | 0.85 | -0.05 | 0.69 | -0.02 | 0.95 |

**Table S2:** The differential metabolites in roots of fountain grass and their relationships with root length, root fresh weight and root MDA content.

| Metabolite                       | Class       | Fold Change | P    | Root length |      | Root fresh weight |      | Root MDA    |      |
|----------------------------------|-------------|-------------|------|-------------|------|-------------------|------|-------------|------|
|                                  |             |             |      | Coefficient | VIP  | Coefficient       | VIP  | Coefficient | VIP  |
| S-lactoylglutathione             | Amino acids | 16.06       | 0.04 | 0.00        | 0.84 | 0.00              | 0.88 | 0.00        | 0.86 |
| 4-Guanidinobutyric acid          | Amino acids | 7.61        | 0.00 | -0.01       | 1.08 | -0.01             | 1.09 | 0.01        | 1.07 |
| Leu-Phe                          | Amino acids | 5.45        | 0.00 | -0.01       | 1.06 | -0.01             | 1.05 | 0.01        | 1.06 |
| Leucylleucine                    | Amino acids | 4.56        | 0.01 | -0.01       | 1.03 | -0.01             | 1.03 | 0.01        | 1.03 |
| Ala-Trp                          | Amino acids | 4.49        | 0.00 | -0.01       | 1.06 | -0.01             | 1.05 | 0.01        | 1.07 |
| Tryptophan                       | Amino acids | 4.14        | 0.00 | -0.01       | 1.04 | -0.01             | 1.02 | 0.02        | 1.06 |
| L-pipecolic acid                 | Amino acids | 3.91        | 0.00 | -0.01       | 1.01 | -0.01             | 1.04 | 0.01        | 1.00 |
| L-Glutamate                      | Amino acids | 3.36        | 0.03 | 0.00        | 0.87 | 0.00              | 0.89 | 0.00        | 0.89 |
| L-Arginine                       | Amino acids | 3.28        | 0.01 | -0.01       | 1.02 | -0.01             | 0.99 | 0.02        | 1.04 |
| L-Aspartate                      | Amino acids | 3.23        | 0.00 | -0.01       | 1.06 | -0.01             | 1.06 | 0.01        | 1.04 |
| O-acetyl-l-serine                | Amino acids | 2.78        | 0.03 | -0.02       | 0.95 | -0.01             | 0.95 | 0.01        | 0.90 |
| N-acetyl-l-aspartic acid         | Amino acids | 2.78        | 0.05 | 0.00        | 0.80 | -0.01             | 0.87 | 0.00        | 0.81 |
| L-pyroglutamic acid              | Amino acids | 2.73        | 0.04 | -0.01       | 0.93 | 0.00              | 0.89 | 0.02        | 0.96 |
| 3-Methylhistidine                | Amino acids | 2.58        | 0.01 | -0.02       | 1.06 | -0.02             | 1.04 | 0.01        | 1.04 |
| D-ornithine                      | Amino acids | 2.55        | 0.00 | -0.01       | 1.06 | -0.01             | 1.06 | 0.01        | 1.06 |
| Alanine                          | Amino acids | 2.55        | 0.01 | -0.01       | 0.96 | -0.01             | 0.99 | 0.00        | 0.94 |
| Gamma-l-glutamyl-l-glutamic acid | Amino acids | 2.51        | 0.00 | -0.02       | 1.08 | -0.01             | 1.06 | 0.01        | 1.06 |
| gamma-aminobutyric acid          | Amino acids | 2.51        | 0.01 | -0.01       | 0.97 | -0.01             | 0.96 | 0.01        | 1.00 |
| 5-L-Glutamyl-L-alanine           | Amino acids | 2.43        | 0.02 | -0.03       | 1.03 | -0.02             | 0.97 | 0.02        | 1.00 |
| DL-2-Aminoadipic acid            | Amino acids | 2.22        | 0.05 | 0.01        | 0.78 | 0.00              | 0.84 | 0.01        | 0.87 |
| Gly-Leu                          | Amino acids | 2.22        | 0.01 | -0.01       | 1.00 | 0.00              | 0.99 | 0.01        | 1.04 |
| Betaine                          | Amino acids | 2.11        | 0.01 | -0.01       | 0.99 | -0.01             | 1.00 | 0.01        | 1.00 |
| L-Valine                         | Amino acids | 2.05        | 0.00 | 0.00        | 0.98 | -0.01             | 1.02 | 0.01        | 0.99 |
| Pantethine                       | Amino acids | 0.36        | 0.00 | 0.01        | 1.04 | 0.00              | 1.04 | -0.01       | 1.06 |
| Allantoic acid                   | Amino acids | 0.28        | 0.00 | 0.01        | 1.05 | 0.01              | 1.04 | -0.01       | 1.07 |
| Cysteine-s-sulfate               | Amino acids | 0.07        | 0.00 | 0.02        | 1.10 | 0.02              | 1.08 | -0.01       | 1.07 |
| Phenylethylamine                 | Benzenoids  | 4.77        | 0.03 | 0.00        | 0.86 | 0.00              | 0.89 | 0.00        | 0.89 |
| Hydroquinone                     | Benzenoids  | 3.76        | 0.01 | 0.00        | 0.94 | -0.01             | 0.98 | 0.00        | 0.93 |
| Coniferyl alcohol                | Benzenoids  | 3.30        | 0.00 | -0.01       | 1.02 | -0.01             | 1.03 | 0.01        | 1.04 |
| Homovanillic acid                | Benzenoids  | 0.49        | 0.00 | 0.02        | 1.09 | 0.01              | 1.06 | -0.02       | 1.06 |
| 2-Hydroxyphenylacetic acid       | Benzenoids  | 0.43        | 0.00 | -0.01       | 0.95 | 0.01              | 1.00 | -0.01       | 1.00 |
| 4-hydroxybenzyl alcohol          | Benzenoids  | 0.39        | 0.00 | 0.01        | 1.08 | 0.01              | 1.07 | -0.01       | 1.08 |
| Aloeemodin                       | Benzenoids  | 0.38        | 0.01 | 0.01        | 1.03 | 0.02              | 1.04 | -0.01       | 1.01 |

|                                    |               |      |      |       |      |       |      |       |      |
|------------------------------------|---------------|------|------|-------|------|-------|------|-------|------|
| Benzamide                          | Benzenoids    | 0.29 | 0.00 | 0.02  | 1.10 | 0.01  | 1.08 | -0.01 | 1.08 |
| 3-Hydroxybenzoate                  | Benzenoids    | 0.26 | 0.01 | 0.02  | 1.05 | 0.01  | 1.03 | -0.01 | 1.01 |
| Pyrocatechol                       | Benzenoids    | 0.22 | 0.04 | 0.03  | 1.02 | 0.03  | 0.97 | -0.01 | 0.92 |
| p-Hydroxyphenylacetic acid         | Benzenoids    | 0.15 | 0.01 | 0.02  | 1.06 | 0.01  | 1.03 | -0.01 | 1.01 |
| Ribitol                            | Carbohydrates | 2.50 | 0.01 | 0.00  | 0.96 | -0.01 | 1.00 | 0.00  | 0.99 |
| Galactinol                         | Carbohydrates | 2.40 | 0.03 | -0.01 | 0.93 | -0.01 | 0.92 | 0.01  | 0.96 |
| N-acetyl-d-glucosamine 6-phosphate | Carbohydrates | 0.32 | 0.00 | 0.02  | 1.09 | 0.02  | 1.06 | -0.01 | 1.05 |
| 2-deoxyribose 5-phosphate          | Carbohydrates | 0.31 | 0.00 | 0.02  | 1.08 | 0.01  | 1.06 | -0.01 | 1.08 |
| 2'-Deoxy-D-ribose                  | Carbohydrates | 0.29 | 0.01 | 0.00  | 0.94 | 0.00  | 0.96 | -0.01 | 1.01 |
| 1-Deoxy-D-xylulose 5-phosphate     | Carbohydrates | 0.25 | 0.01 | 0.00  | 0.98 | 0.00  | 0.98 | -0.02 | 1.02 |
| Udp-d-glucose                      | Carbohydrates | 0.22 | 0.05 | 0.04  | 1.01 | 0.02  | 0.95 | -0.01 | 0.91 |
| 5(S)-HETE                          | Lipids        | 4.16 | 0.05 | -0.01 | 0.93 | -0.01 | 0.89 | 0.02  | 0.95 |
| Stearidonic Acid                   | Lipids        | 3.68 | 0.00 | -0.01 | 1.05 | -0.01 | 1.04 | 0.01  | 1.07 |
| 4-oxoretinol                       | Lipids        | 3.10 | 0.01 | -0.01 | 0.99 | -0.01 | 0.98 | 0.01  | 0.99 |
| Mesaconic acid                     | Lipids        | 2.62 | 0.01 | -0.01 | 1.04 | -0.01 | 1.01 | 0.02  | 1.05 |
| Traumatic Acid                     | Lipids        | 2.25 | 0.01 | -0.03 | 1.08 | -0.02 | 1.03 | 0.01  | 1.02 |
| 3-hydroxy-3-methylglutaric acid    | Lipids        | 2.17 | 0.01 | -0.02 | 1.03 | -0.01 | 1.01 | 0.01  | 1.01 |
| Linoleic acid                      | Lipids        | 0.09 | 0.00 | 0.02  | 1.09 | 0.01  | 1.06 | -0.01 | 1.06 |
| Guanosine diphosphate mannose      | Nucleosides   | 4.73 | 0.00 | 0.00  | 1.00 | -0.01 | 1.03 | 0.01  | 1.00 |
| S-adenosyl-l-homocysteine          | Nucleosides   | 4.50 | 0.04 | 0.00  | 0.85 | -0.01 | 0.88 | 0.00  | 0.88 |
| Guanosine 5'-monophosphate         | Nucleosides   | 3.25 | 0.01 | -0.01 | 1.00 | -0.01 | 0.98 | 0.01  | 1.03 |
| Xanthine                           | Nucleosides   | 3.25 | 0.01 | 0.00  | 0.93 | -0.01 | 0.97 | 0.00  | 0.92 |
| Deoxyinosine                       | Nucleosides   | 3.03 | 0.04 | 0.00  | 0.87 | -0.01 | 0.91 | 0.00  | 0.85 |
| S-methyl-5'-thioadenosine          | Nucleosides   | 2.46 | 0.01 | 0.00  | 0.97 | -0.01 | 1.00 | 0.01  | 0.98 |
| Uridine 5'-monophosphate           | Nucleosides   | 2.11 | 0.00 | 0.00  | 0.98 | -0.01 | 1.01 | 0.01  | 1.02 |
| Thymidine 5'-diphosphate           | Nucleosides   | 0.44 | 0.02 | 0.02  | 1.03 | 0.02  | 1.01 | -0.01 | 0.99 |
| Thymidine 5'-triphosphate          | Nucleosides   | 0.41 | 0.01 | 0.02  | 1.03 | 0.01  | 1.02 | -0.01 | 1.01 |
| 2'-deoxyguanosine 5'-monophosphate | Nucleosides   | 0.41 | 0.01 | 0.03  | 1.05 | 0.02  | 1.03 | -0.01 | 1.00 |
| Cytidine 5'-diphosphate            | Nucleosides   | 0.40 | 0.01 | 0.02  | 1.04 | 0.02  | 1.03 | -0.01 | 0.97 |
| NADH                               | Nucleosides   | 0.38 | 0.03 | 0.02  | 0.97 | 0.02  | 0.95 | -0.01 | 0.90 |
| Flavine mononucleotide             | Nucleosides   | 0.31 | 0.02 | 0.03  | 1.05 | 0.01  | 0.99 | -0.02 | 0.98 |
| 2'-deoxyinosine                    | Nucleosides   | 0.27 | 0.00 | 0.00  | 0.99 | 0.00  | 1.02 | -0.01 | 1.04 |
| Adenosine                          | Nucleosides   | 0.24 | 0.00 | 0.02  | 1.10 | 0.02  | 1.08 | -0.01 | 1.06 |
| 1-methyladenosine                  | Nucleosides   | 0.23 | 0.03 | -0.02 | 0.82 | 0.00  | 0.88 | -0.01 | 0.92 |
| Deoxyadenosine                     | Nucleosides   | 0.22 | 0.01 | -0.01 | 0.91 | 0.01  | 0.96 | 0.00  | 0.94 |
| Adenosine 5'-monophosphate         | Nucleosides   | 0.14 | 0.01 | 0.03  | 1.08 | 0.02  | 1.05 | -0.01 | 1.02 |

|                                     |                                  |       |      |       |      |       |      |       |      |
|-------------------------------------|----------------------------------|-------|------|-------|------|-------|------|-------|------|
| Nicotinic acid adenine dinucleotide | Nucleosides                      | 0.12  | 0.02 | -0.01 | 0.88 | 0.01  | 0.92 | -0.01 | 0.95 |
| Glyoxylate                          | Organic acids                    | 3.22  | 0.02 | -0.02 | 0.98 | -0.01 | 0.98 | 0.01  | 0.93 |
| Glyceric acid                       | Organic acids                    | 2.21  | 0.00 | -0.01 | 1.04 | -0.01 | 1.04 | 0.01  | 1.07 |
| (R)-3-Hydroxybutyric acid           | Organic acids                    | 0.48  | 0.01 | 0.01  | 1.00 | 0.00  | 0.98 | -0.01 | 1.00 |
| Pyruvaldehyde                       | Organic acids                    | 0.26  | 0.00 | 0.02  | 1.09 | 0.01  | 1.06 | -0.01 | 1.05 |
| Acetylcholine                       | Others                           | 6.83  | 0.00 | -0.01 | 1.05 | -0.01 | 1.03 | 0.02  | 1.06 |
| Betaine aldehyde                    | Others                           | 6.45  | 0.00 | -0.01 | 1.04 | -0.01 | 1.02 | 0.01  | 1.05 |
| 3-dehydroquinic acid                | Others                           | 4.54  | 0.01 | 0.00  | 0.93 | -0.01 | 0.98 | 0.00  | 0.93 |
| Sphinganine                         | Others                           | 3.66  | 0.02 | 0.00  | 0.90 | 0.00  | 0.92 | 0.00  | 0.92 |
| Folinic acid                        | Others                           | 3.21  | 0.00 | -0.01 | 1.06 | -0.01 | 1.04 | 0.02  | 1.06 |
| Phytosphingosine                    | Others                           | 2.69  | 0.03 | 0.00  | 0.86 | -0.01 | 0.90 | 0.00  | 0.86 |
| Nicotinate                          | Others                           | 2.45  | 0.00 | 0.00  | 1.02 | -0.01 | 1.05 | 0.01  | 1.03 |
| Diacetyl                            | Others                           | 2.16  | 0.02 | 0.01  | 0.85 | 0.00  | 0.92 | 0.00  | 0.92 |
| Riboflavin                          | Others                           | 0.44  | 0.03 | 0.01  | 0.95 | 0.02  | 0.97 | 0.00  | 0.91 |
| Lusitanicoside                      | Others                           | 0.38  | 0.00 | 0.01  | 1.03 | 0.01  | 1.06 | -0.01 | 1.04 |
| 5-methoxyindoleacetate              | Others                           | 0.25  | 0.01 | 0.01  | 1.01 | 0.00  | 0.99 | -0.02 | 1.02 |
| Matairesinol                        | Others                           | 0.25  | 0.00 | 0.01  | 1.02 | 0.01  | 1.02 | -0.01 | 1.06 |
| Bisdemethoxycurcumin                | Phenylpropanoids and polyketides | 23.63 | 0.00 | -0.01 | 1.08 | -0.01 | 1.08 | 0.01  | 1.08 |
| 3-hydroxy-4-methoxycinnamic acid    | Phenylpropanoids and polyketides | 9.31  | 0.01 | -0.01 | 1.03 | -0.01 | 1.00 | 0.02  | 1.05 |
| P-coumaric acid                     | Phenylpropanoids and polyketides | 8.76  | 0.00 | -0.01 | 1.07 | -0.01 | 1.08 | 0.01  | 1.08 |
| Genistin                            | Phenylpropanoids and polyketides | 6.12  | 0.00 | -0.01 | 1.06 | -0.01 | 1.04 | 0.02  | 1.07 |
| Astilbin                            | Phenylpropanoids and polyketides | 3.16  | 0.01 | -0.01 | 0.97 | -0.01 | 1.01 | 0.01  | 0.96 |
| Neohesperidin                       | Phenylpropanoids and polyketides | 2.95  | 0.03 | -0.02 | 1.00 | -0.02 | 0.95 | 0.02  | 0.97 |
| Larixinic Acid                      | Phenylpropanoids and polyketides | 2.44  | 0.04 | -0.01 | 0.91 | -0.01 | 0.89 | 0.01  | 0.95 |
| 7-methoxycoumarin                   | Phenylpropanoids and polyketides | 2.37  | 0.00 | -0.01 | 1.02 | 0.00  | 1.01 | 0.01  | 1.06 |
| Naringin dihydrochalcone            | Phenylpropanoids and polyketides | 0.42  | 0.01 | 0.01  | 0.98 | 0.00  | 0.96 | -0.02 | 1.01 |
| Rutamarin                           | Phenylpropanoids and polyketides | 0.33  | 0.00 | 0.00  | 0.99 | 0.00  | 1.02 | -0.01 | 1.02 |
| Diosmetin                           | Phenylpropanoids and polyketides | 0.27  | 0.03 | 0.00  | 0.93 | 0.01  | 0.94 | -0.01 | 0.96 |
| 3-(2-Hydroxyphenyl)propionic acid   | Phenylpropanoids and polyketides | 0.27  | 0.00 | 0.01  | 1.05 | 0.01  | 1.05 | -0.01 | 1.07 |
| Indole-3-butyric acid               | Phytohormones                    | 5.79  | 0.01 | -0.01 | 0.98 | -0.02 | 1.02 | 0.00  | 0.97 |

|                   |               |      |      |       |      |       |      |       |      |
|-------------------|---------------|------|------|-------|------|-------|------|-------|------|
| Phenylacetic acid | Phytohormones | 5.08 | 0.00 | -0.01 | 1.09 | -0.01 | 1.08 | 0.01  | 1.08 |
| Melatonin         | Phytohormones | 0.45 | 0.01 | 0.00  | 0.94 | 0.01  | 0.98 | -0.01 | 0.98 |
| Kinetin           | Phytohormones | 0.21 | 0.00 | 0.02  | 1.09 | 0.02  | 1.06 | -0.01 | 1.06 |
